# Supplementary material for: Nanoreporter PET predicts the efficacy of anti-cancer nanotherapy
Source: Nat Commun. 2016 Jun 20;7:11838. doi: 10.1038/ncomms11838 (PMC4915130; doi:10.1038/ncomms11838)
Supplement: Supplementary Information — Supplementary Figures 1-6 and Supplementary Tables 1-2 [file ncomms11838-s1.pdf]

## SUPPLEMENTARY INFORMATION

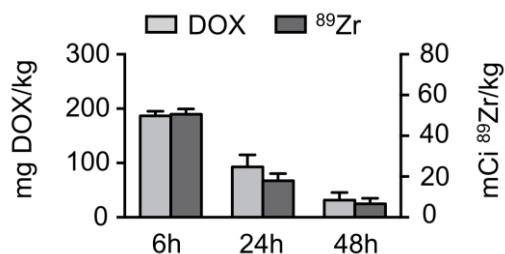

**Supplementary Fig. 1 |  $^{89}\text{Zr}$ -NRep mirrors DOX concentration in the blood pool.**

Absolute blood pool concentrations for DOX and  $^{89}\text{Zr}$  (at 6h, 24h and 48h post injection) in mg DOX/kg and mCi  $^{89}\text{Zr}$ /kg, respectively, in mice co-injected with Doxil (at 20 mg DOX/kg) and  $^{89}\text{Zr}$ -NRep (at 8.0 mCi/kg). DOX and radioactivity concentrations were determined using the same procedure as with tumor samples.

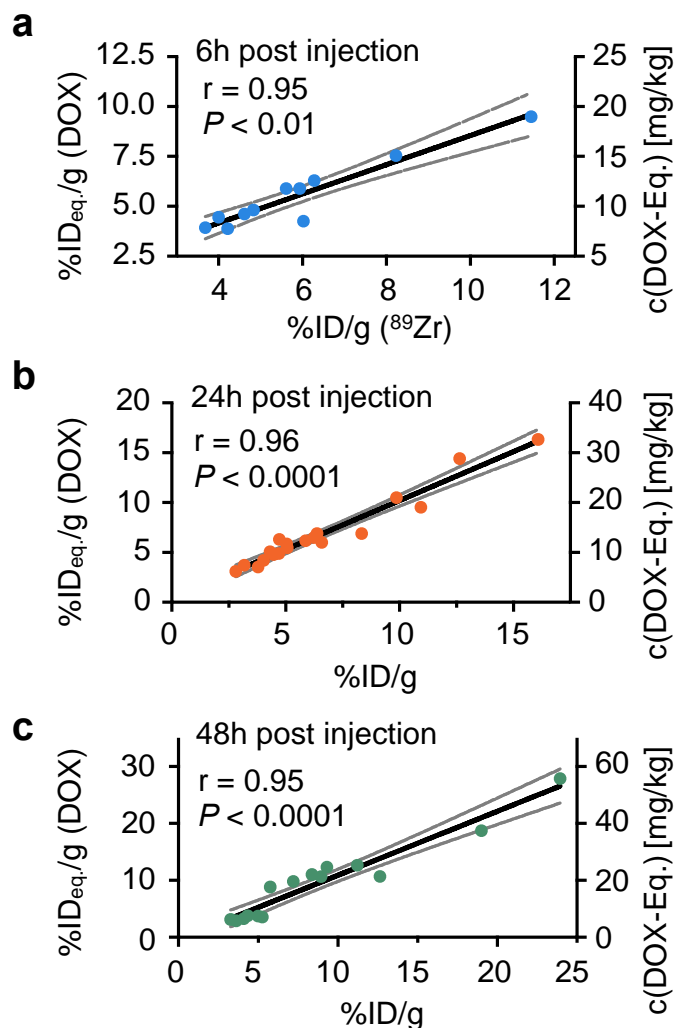

**Supplementary Fig. 2 | <sup>89</sup>Zr-NRep mirrors DOX accumulation in tumor.** Curves show correlation between radioactivity and doxorubicin fluorescence determined ex vivo in digested tumor samples at (a) 6 h, (b) 24 h and (c) 48 h after co-injection of Doxil and <sup>89</sup>Zr-NRep. Pearson's  $r$  coefficients were calculated to determine correlation.

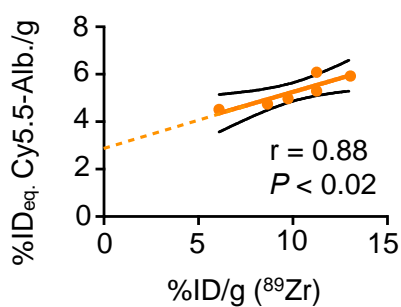

**Supplementary Fig. 3 |  $^{89}\text{Zr}$ -NRep as nanoreporter for Abraxane®.** Correlation between  $^{89}\text{Zr}$ -NRep (%ID/g) and fluorescently labeled Cy5.5-Albumin@Abraxane (%ID<sub>eq.</sub>/g), determined *ex vivo* in digested tumor samples (N = 6) at 24 h after co-injection of the nanomaterial and  $^{89}\text{Zr}$ -NRep. Pearson's  $r$  coefficient was calculated to determine correlation.

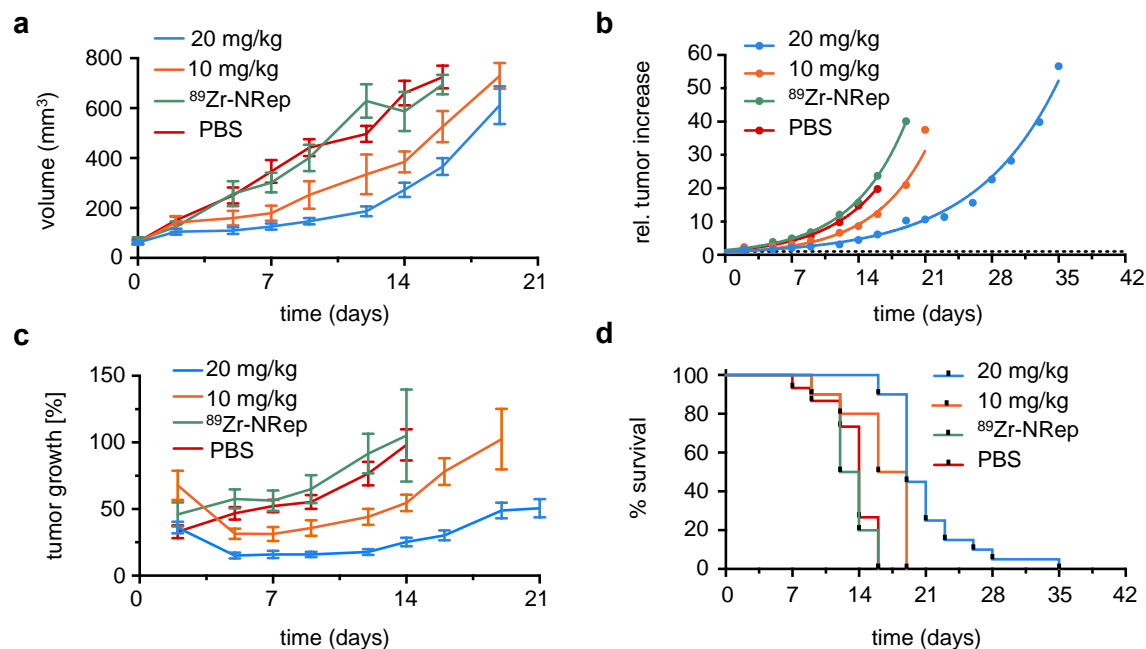

**Supplementary Fig. 4 | Tumor growth for the different groups of 4T1 tumor-bearing female NCr nude mice used in the therapeutic study. (a) Tumor volume (mm<sup>3</sup>) vs. time (days post injection). (b) Relative tumor increase after administration of the corresponding doses. (c) Average cumulative daily tumor growth rates. (d) Survival curves for the different groups in the therapeutic study. Data are expressed as mean  $\pm$  s.e.m.**

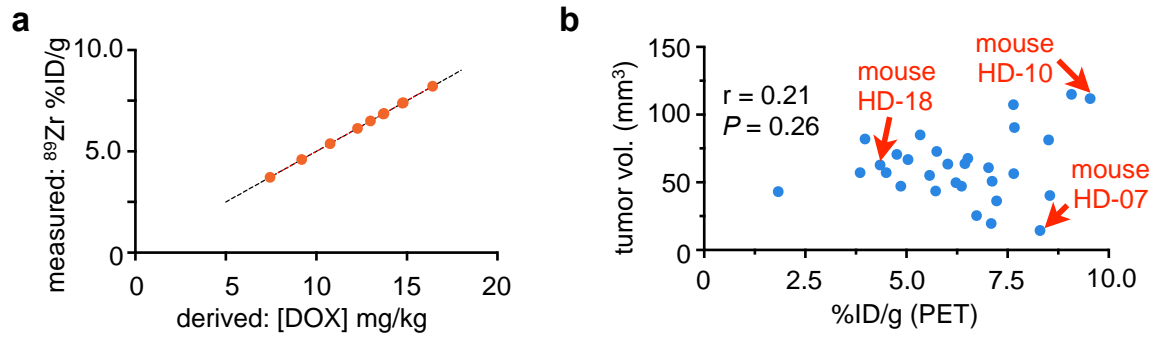

**Supplementary Fig. 5 |  $^{89}\text{Zr}$ -NRep uptake does not correlate with tumor size.** (a) Uptake values obtained for Doxil treatment mice (N = 30) versus tumor volumes at time of administration. Labeled red arrows indicate data points for mice HD-10 (large tumor, high uptake), HD-07 (small tumor, high uptake) and HD-18 (medium-sized tumor, low uptake). Their PET scans and uptake values are shown in figure 3. (b) Determination of intratumoral DOX concentrations based on  $^{89}\text{Zr}$ -NRep %ID/g uptake values, data shown for mice receiving 10 mg/kg Doxil (N = 10).

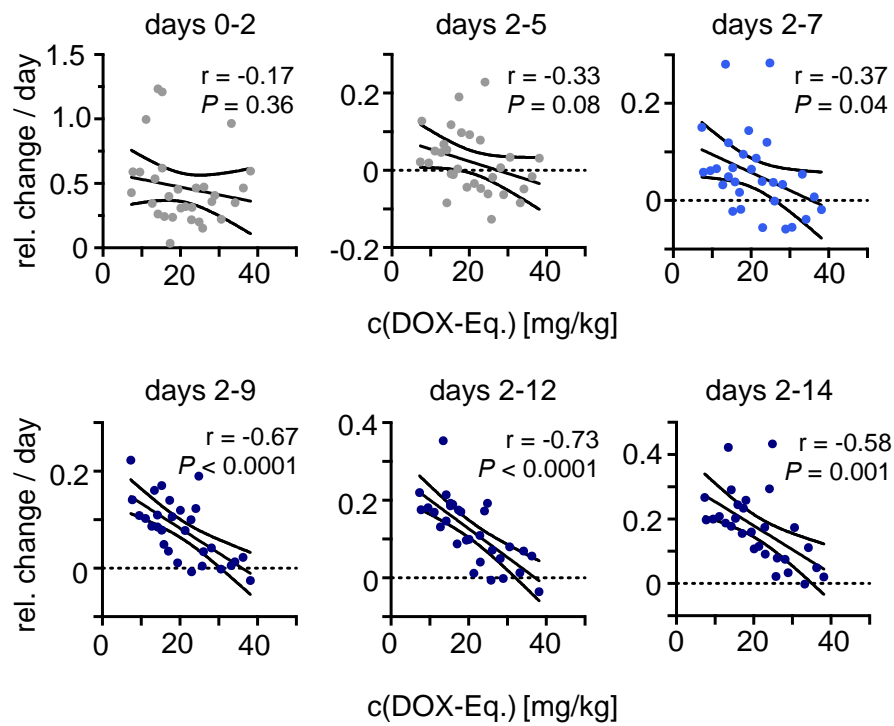

**Supplementary Fig. 6 | DOX concentration in tumors, as determined by  $^{89}\text{Zr}$ -NRep PET imaging, inversely correlates with tumor growth rate.** Significant inverse correlations between the non-invasively determined amounts of DOX delivered to tumors can be observed at 7, 9, 12 and 14 days post administration. Pearson's  $r$  coefficients were calculated to determine correlation.

**Supplementary Table 1.** Lipid composition (in mol %), size (as mean effective diameter, MED) polydispersity index (PDI) and Z-potential of the different liposomes used.

|                             | DPPC* | Cholesterol | DSPE-<br>PEG2000 | DSPE-<br>DFO | MED / nm    | PDI         | Z-Potential /<br>mV |
|-----------------------------|-------|-------------|------------------|--------------|-------------|-------------|---------------------|
| <b>Doxil</b>                | 53    | 42          | 5                | -            | 82.4 ± 0.2  | 0.05 ± 0.01 | -31.1 ± 11.9        |
| <b>Plain</b>                | 61.6  | 33.4        | 5                | -            | 103.9 ± 0.7 | 0.11 ± 0.02 | -23.7 ± 4.7         |
| <b><sup>89</sup>Zr-NRep</b> | 61.3  | 33.4        | 5                | 0.3          | 113.8 ± 3.1 | 0.15 ± 0.02 | -26.1 ± 8.9**       |

\* HSPC (hydrogenated soy phosphatidylcholine) for Doxil.

\*\* Unlabeled.

**Supplementary Table 2.** Composition (expressed as µmol of total lipids, activity and mg of doxorubicin), size (MED) and polydispersity index (PDI) of the doses used in the study.

|                                  | Doxil    | Plain    | <sup>89</sup> Zr-NRep / µCi | DOX    | MED / nm    | PDI         |
|----------------------------------|----------|----------|-----------------------------|--------|-------------|-------------|
| <b>Ex vivo</b>                   | 2.4 µmol | -        | 20.3 ± 3.9                  | 0.2 mg | 83.0 ± 1.2  | 0.06 ± 0.01 |
| <b>In vivo</b>                   | 2.4 µmol | -        | 142 ± 1                     | 0.2 mg | 88.9 ± 0.7  | 0.10 ± 0.03 |
| <b><sup>89</sup>Zr-NRep only</b> | -        | 4.8 µmol | 163 ± 16                    | -      | 106.7 ± 1.6 | 0.12 ± 0.01 |
| <b>Low Doxil</b>                 | 2.4 µmol | 2.4 µmol | 163 ± 13                    | 0.2 mg | 94.1 ± 1.6  | 0.11 ± 0.01 |
| <b>High Doxil</b>                | 4.8 µmol | -        | 165 ± 12                    | 0.4 mg | 87.4 ± 1.2  | 0.09 ± 0.01 |
